# Supplementary material
Source: PubMed Central journal article supplement (PMC2674260)
Supplement: supp_136_9_1539__7.pdf [file supp_136_9_1539__7.pdf]

**Table S2. The percentage of yolk platelets lacking Seryp<sup>-</sup> was determined in the listed tissues at seven developmental Nieuwkoop-Faber (NF) stages**

| Tissue                   | Time pf (hour) | NF stage   | <i>n</i> | Average Seryp <sup>-</sup> (%) | s.d. Seryp <sup>-</sup> (%) |
|--------------------------|----------------|------------|----------|--------------------------------|-----------------------------|
| <b>Unactivated egg</b>   | <b>0</b>       | <b>egg</b> |          |                                |                             |
| Animal pole              |                |            | 3        | 2.1                            | 2.1                         |
| Marginal zone            |                |            | 3        | 1.2                            | 2.0                         |
| Vegetal pole             |                |            | 3        | 0.5                            | 0.5                         |
| <b>Blastula</b>          | <b>8.5</b>     | <b>9</b>   |          |                                |                             |
| Animal pole              |                |            | 3        | 1.5                            | 0.3                         |
| Marginal zone            |                |            | 3        | 1.5                            | 1.4                         |
| Vegetal pole             |                |            | 3        | 1.0                            | 1.0                         |
| <b>Gastrula</b>          | <b>20.5</b>    | <b>12</b>  |          |                                |                             |
| Neurectoderm             |                |            | 3        | 7.0                            | 3.0                         |
| Epidermal ectoderm       |                |            | 3        | 5.8                            | 3.0                         |
| Dorsal lip               |                |            | 3        | 5.0                            | 1.9                         |
| Archentron roof          |                |            | 3        | 0.3                            | 0.5                         |
| Deep endoderm            |                |            | 3        | 1.5                            | 0.7                         |
| <b>Early neurula</b>     | <b>23</b>      | <b>14</b>  |          |                                |                             |
| Anterior neural plate    |                |            | 3        | 22.1                           | 1.3                         |
| Neural plate (mid-body)  |                |            | 3        | 17.8                           | 1.5                         |
| Epidermal ectoderm       |                |            | 3        | 17.4                           | 4.5                         |
| Notochord                |                |            | 3        | 13.9                           | 3.8                         |
| Somitogenic mesoderm     |                |            | 3        | 11.6                           | 3.7                         |
| Archentron roof          |                |            | 3        | 6.1                            | 3.9                         |
| Deep endoderm            |                |            | 3        | 3.7                            | 3.5                         |
| <b>Late neurula</b>      | <b>27</b>      | <b>18</b>  |          |                                |                             |
| Prosencephalon           |                |            | 3        | 29.7                           | 4.1                         |
| Neural groove (mid-body) |                |            | 3        | 31.8                           | 6.5                         |
| Cement gland anlage      |                |            | 3        | 29.3                           | 3.4                         |
| Epidermal ectoderm       |                |            | 3        | 22.6                           | 2.6                         |
| Notochord                |                |            | 3        | 15.3                           | 0.1                         |
| Somitogenic mesoderm     |                |            | 3        | 14.1                           | 3.8                         |
| Archentron roof          |                |            | 4        | 8.0                            | 1.8                         |
| Deep endoderm            |                |            | 3        | 3.1                            | 2.9                         |
| <b>Early tailbud</b>     | <b>30</b>      | <b>21</b>  |          |                                |                             |
| Eye anlage               |                |            | 5        | 46.9                           | 9.1                         |
| Prosencephalon           |                |            | 5        | 41.0                           | 8.9                         |
| Neural tube (mid-body)   |                |            | 3        | 29.3                           | 10.8                        |
| Cement gland anlage      |                |            | 4        | 35.8                           | 6.3                         |
| Epidermis                |                |            | 4        | 25.0                           | 6.1                         |
| Notochord                |                |            | 4        | 24.3                           | 6.7                         |
| Somite                   |                |            | 4        | 23.4                           | 10.6                        |
| Archentron roof          |                |            | 4        | 7.7                            | 5.6                         |
| Deep endoderm            |                |            | 4        | 3.2                            | 1.8                         |
| <b>Tailbud</b>           | <b>47</b>      | <b>27</b>  |          |                                |                             |
| Eye vesicle              |                |            | 3        | 82.1                           | 11.8                        |
| Prosencephalon           |                |            | 3        | 61.2                           | 13.9                        |
| Otic vesicle             |                |            | 3        | 57.6                           | 6.5                         |
| Lens placode             |                |            | 3        | 64.3                           | 5.2                         |
| Cement gland             |                |            | 3        | 72.7                           | 19.4                        |
| Epidermis                |                |            | 3        | 44.8                           | 4.2                         |
| Notochord                |                |            | 3        | 55.8                           | 14.4                        |
| Somites                  |                |            | 4        | 53.2                           | 19.4                        |
| Heart anlage             |                |            | 3        | 40.9                           | 11.0                        |
| Tailbud tip              |                |            | 3        | 47.5                           | 4.7                         |
| Arch endoderm epithelium |                |            | 4        | 30.7                           | 10.4                        |
| Oral endoderm epithelium |                |            | 4        | 23.2                           | 9.5                         |
| Deep endoderm            |                |            | 3        | 9.3                            | 1.0                         |

The number (*n*) of measurements is noted; in all tissues at all stages, at least three measurements were made on embryos derived from different female frogs and so are genetically independent. In most cases, embryos were derived from different males as well. The time post-fertilization (pf) is noted and corresponds to the majority of measurements (76%) made on embryos that were reared at 22°C. The remaining measurements (22%) were made on embryos reared at 18°C, except for three measurements made on one stage 9 embryo that was reared at 13°C. We noted no obvious effects of temperature on Seryp<sup>-</sup> (%).
