# Supplementary material
Source: PubMed Central journal article supplement (PMC2674260)

*oocyte series 1*

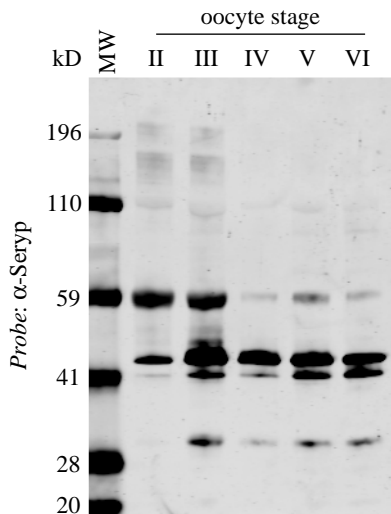

*oocyte series 2*

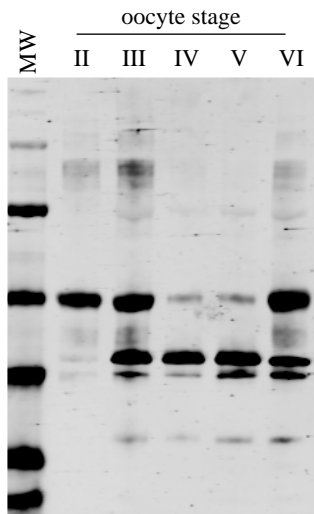

*oocyte series 3*

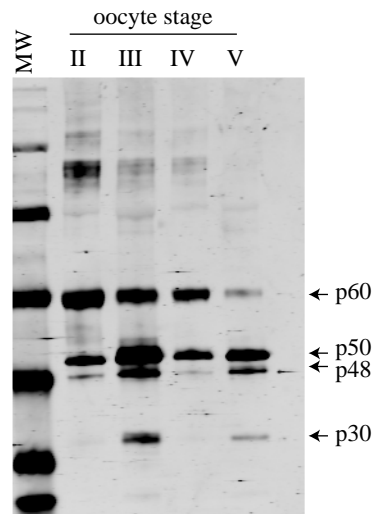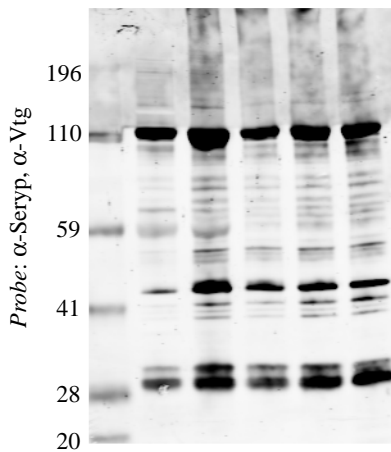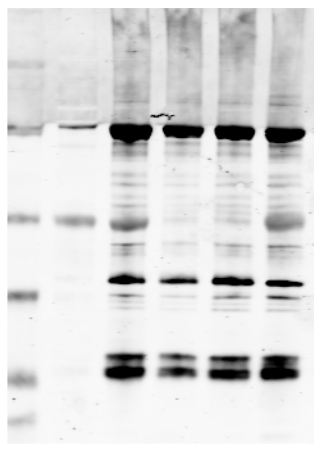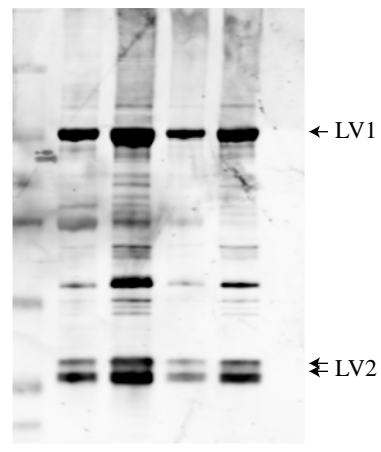

Supplement: supp_136_9_1539__2.pdf [file supp_136_9_1539__2.pdf]

## Amount of total RNA from liver with an equivalent amount of transcript (pg)

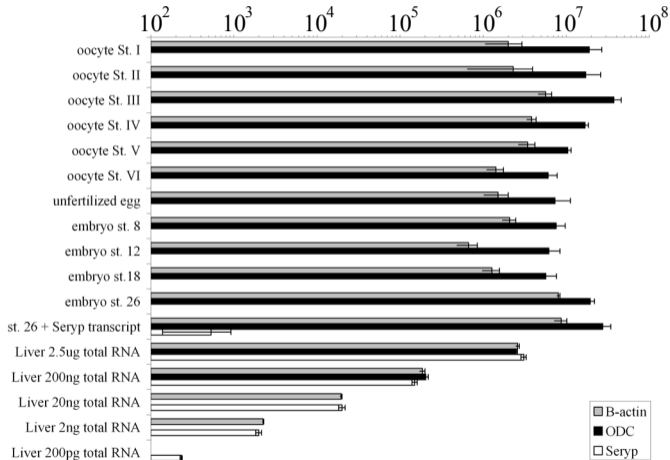

Supplement: supp_136_9_1539__3.pdf [file supp_136_9_1539__3.pdf]
